# Supplementary material for: Serum Levels of ApoA1 and ApoA2 Are Associated with Cognitive Status in Older Men
Source: Hindawi journal article supplement (doi:10.1155/2015/481621), 2015-01-01
Supplement: f1 [file 481621.f1.zip]

Supplementary Table 1. Quantitative range, intra and inter-CV% for all assays

|                | Quantitative Range |              |                 | intra-Assay CV% | inter-Assay CV% |
|----------------|--------------------|--------------|-----------------|-----------------|-----------------|
|                | LLOQ               | ULOQ         | Sensitivity     |                 |                 |
| TC             | 0.08mmol/L         | 20.7mmol/L   | 0.08mmol/L      | 0.8             | 1.7             |
| TG             | 0.05mmol/L         | 11.3mmol/L   | 0.05mmol/L      | 1.5             | 1.8             |
| IL-1 $\beta$   | 1.9                | 6497.4       | *               | 6               | 8               |
| IL-4           | 0.27               | 3502.02      | *               | 9               | 8               |
| IL-6           | 1.55               | 23151.04     | *               | 7               | 11              |
| IL-10          | 1.61               | 6501.41      | *               | 5               | 6               |
| TNF- $\alpha$  | 6.61               | 84296.25     | *               | 8               | 6               |
| TGF- $\beta$ 1 | 5.95               | 7506.9       | *               | 4.5             | 4.9             |
| RANTES         | 8.67               | 2389.2       | *               | 9               | 6               |
| LPO            | Unfound            | Unfound      | Unfound         | 3.3             | 6.99            |
| POD            | 0.5U/mL            | 300U/mL      | 0.5U/mL         | 1.9             | 5.12            |
| SOD            | 0.5U/mL            | 122.1U/mL    | 0.5U/mL         | 5.5             | 3.32            |
| CAT            | 0.2U/mL            | 24.8U/mL     | 0.2U/mL         | 1.9             | 4.94            |
| GSH-px         | 20U/mL             | 330U/mL      | 20U/mL          | 3.1             | 4.34            |
| ApoA1          | Unfound            | Unfound      | 1.48ng/mL       | < 10            | < 20            |
| ApoA2          | Unfound            | Unfound      | 1.00ng/mL       | < 10            | < 20            |
| ApoB           | Unfound            | Unfound      | 4.84ng/mL       | < 10            | < 20            |
| ApoC2          | Unfound            | Unfound      | 1.22ng/mL       | < 10            | < 20            |
| ApoC3          | Unfound            | Unfound      | 1.71ng/mL       | < 10            | < 20            |
| ApoE           | 0.031 $\mu$ g/ml   | 2 $\mu$ g/ml | 0.03 $\mu$ g/ml | 4.7             | 8.9             |
| ApoJ           | 3.12ng/mL          | 200ng/mL     | 1.05ng/mL       | 3.7             | 7.2             |
| ApoH           | 0.625ng/mL         | 40ng/mL      | 0.6ng/mL        | 4.8             | 7.2             |

\* fluorescence intensity was used as relevant concentration.
