# Supplementary material for: Serum Levels of ApoA1 and ApoA2 Are Associated with Cognitive Status in Older Men
Source: Hindawi journal article supplement (doi:10.1155/2015/481621), 2015-01-01

Supplementary Figure 2. The representative standard curve of ApoJ using 8 standard concentrations

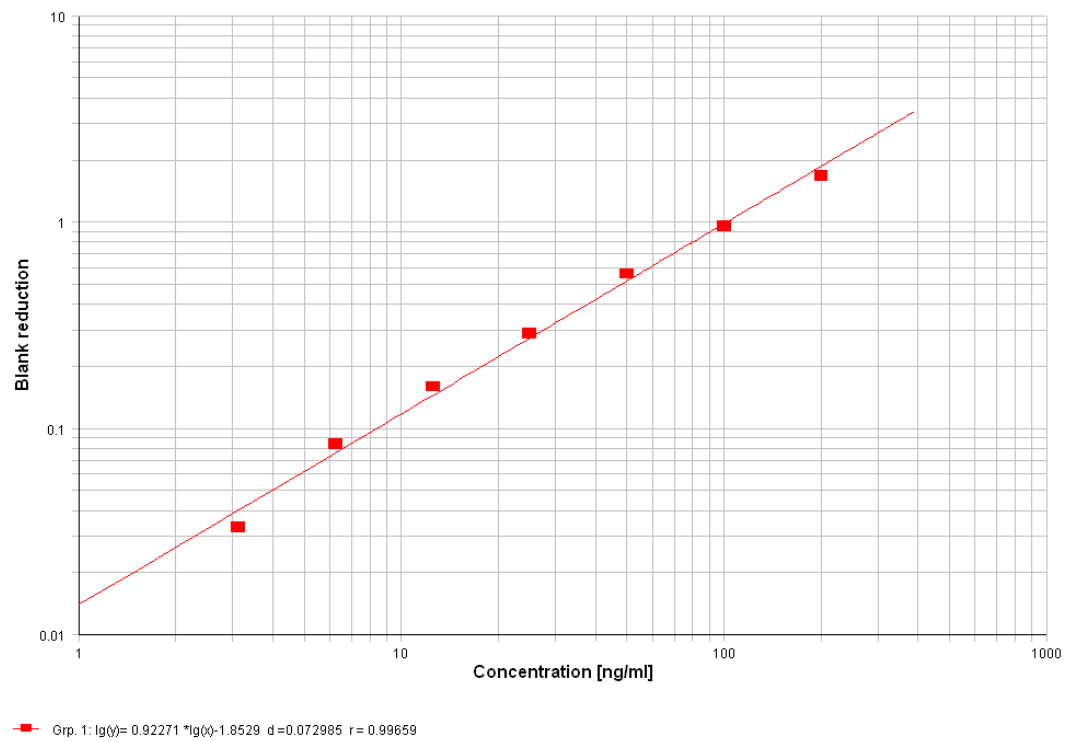

Supplement: f1 [file 481621.f1.zip]
