# Supplementary material for: Serum Levels of ApoA1 and ApoA2 Are Associated with Cognitive Status in Older Men
Source: Hindawi journal article supplement (doi:10.1155/2015/481621), 2015-01-01

Supplementary Figure 1. The standard curves of the corresponding fluorescence intensity of different cytokines to objective concentration (pg/mL)

a. IL-1  $\beta$

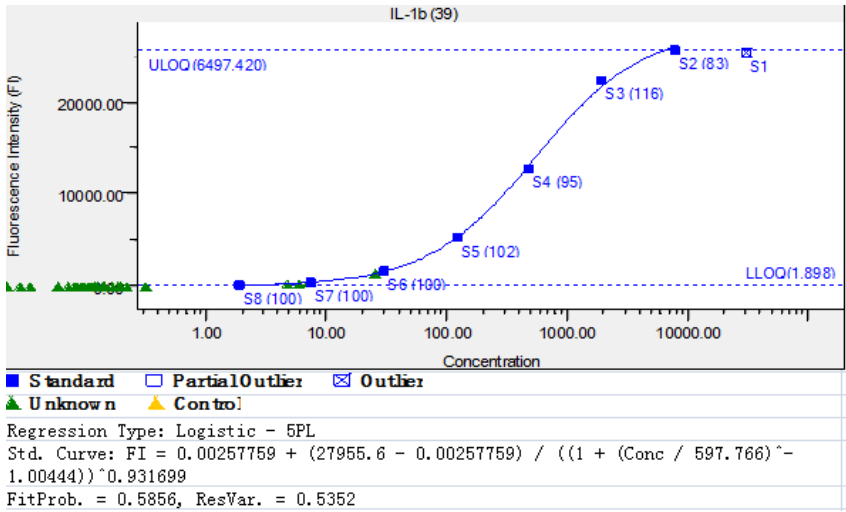

b. IL-6

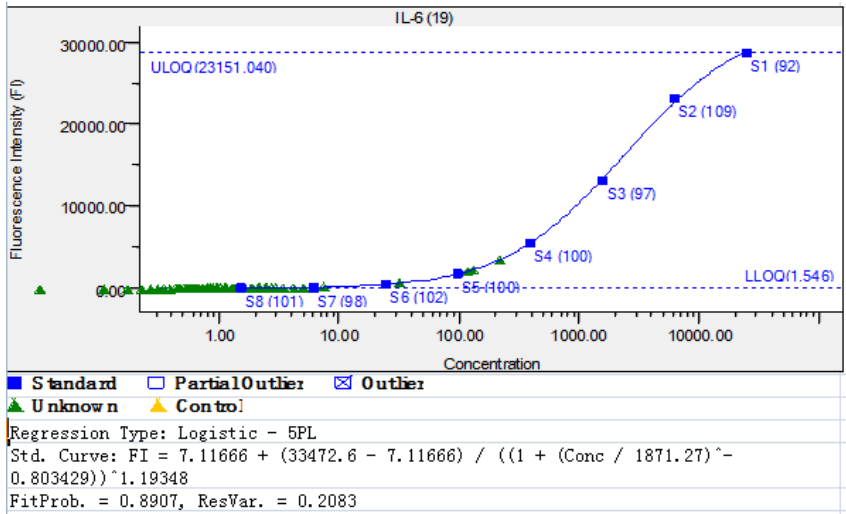

c. IL-4

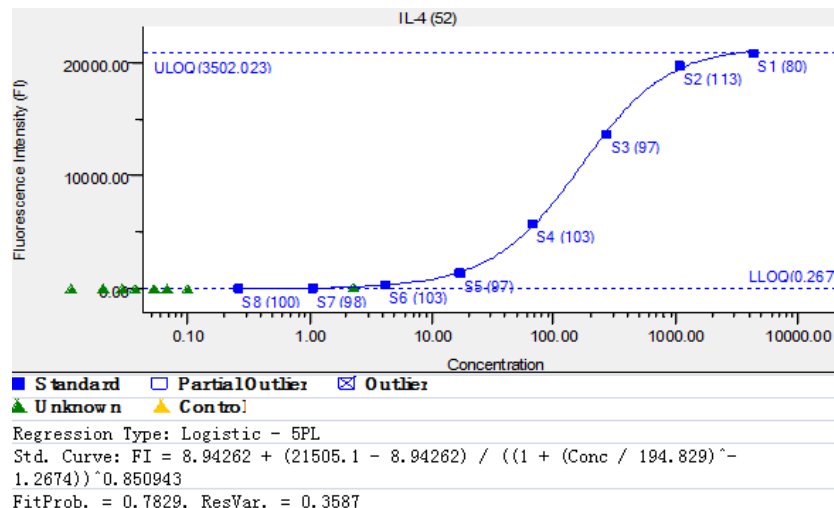

d. IL-10

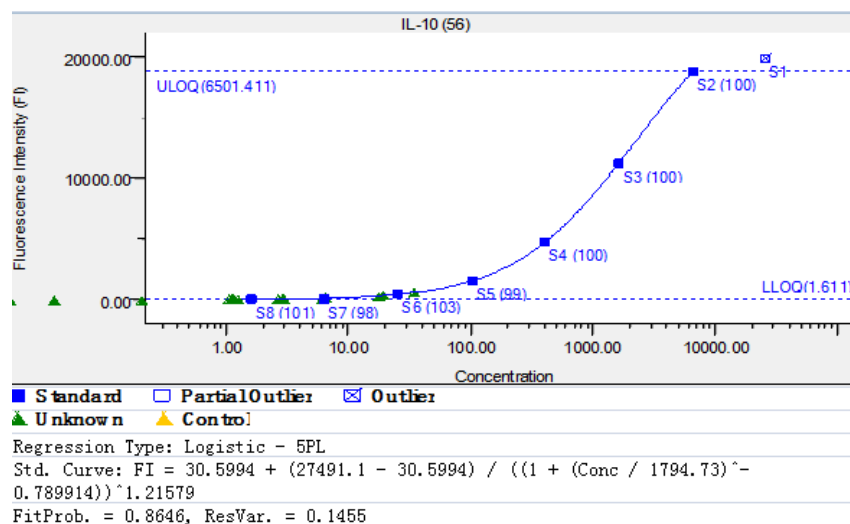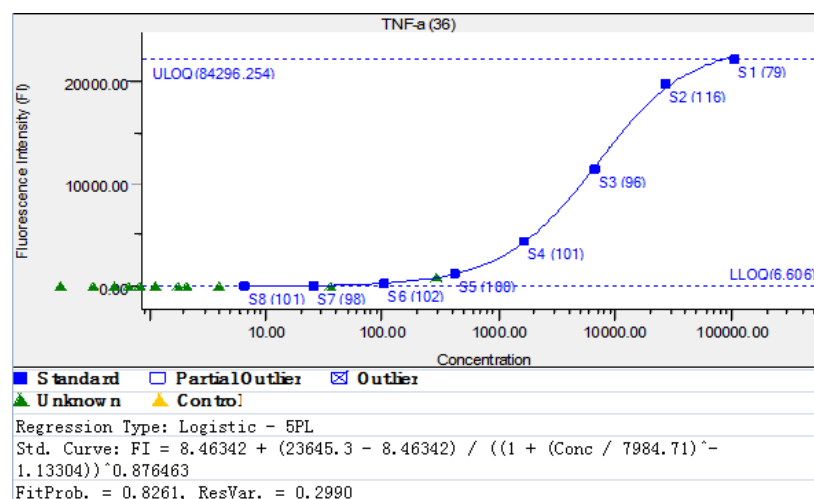

e. RANTES

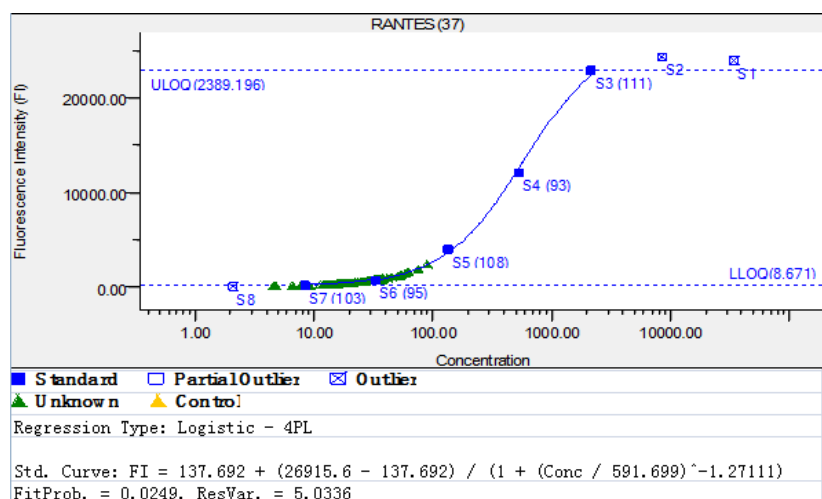

f. TGF- $\beta$

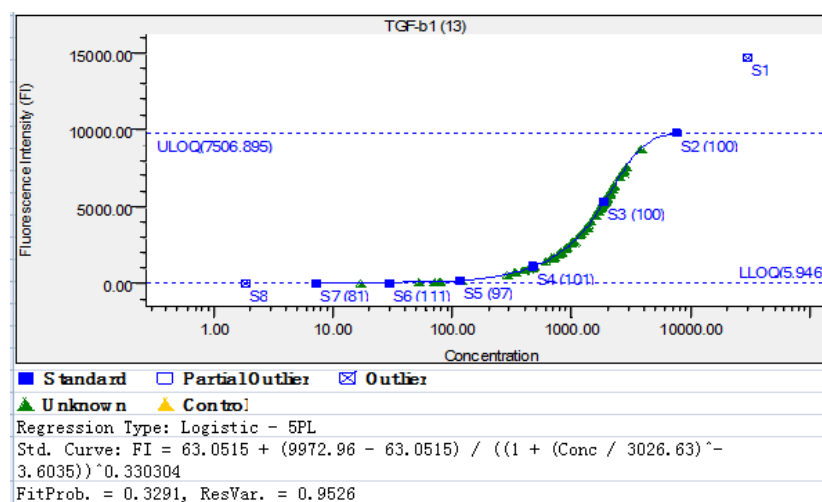

Supplement: f1 [file 481621.f1.zip]
